# Supplementary material for: Refining the Role of Pyruvate Dehydrogenase Kinases in Glioblastoma Development
Source: MDPI journal article supplement (doi:10.3390/cancers14153769), 2022-08-02

# Figure 2B

PDHK1 (45 kDa)

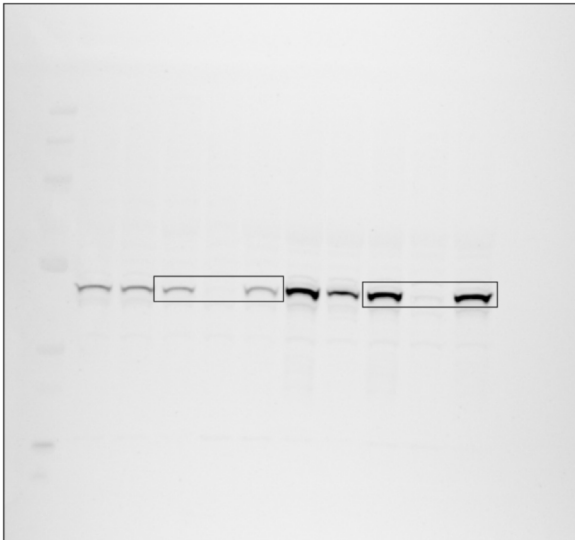

Vinculin (117 kDa)

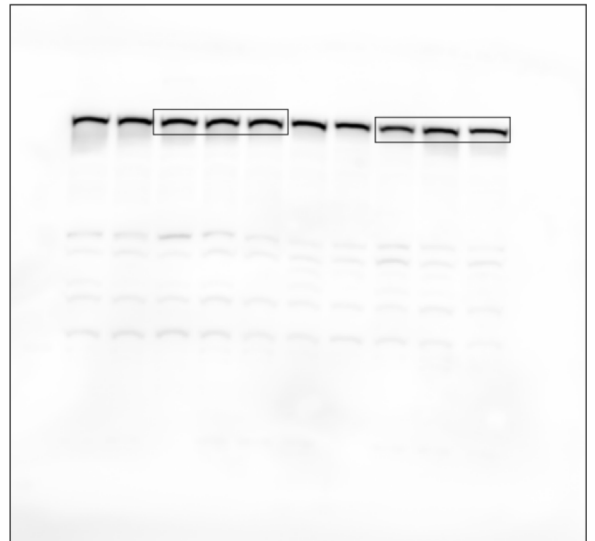

PDHK2 (45 kDa)

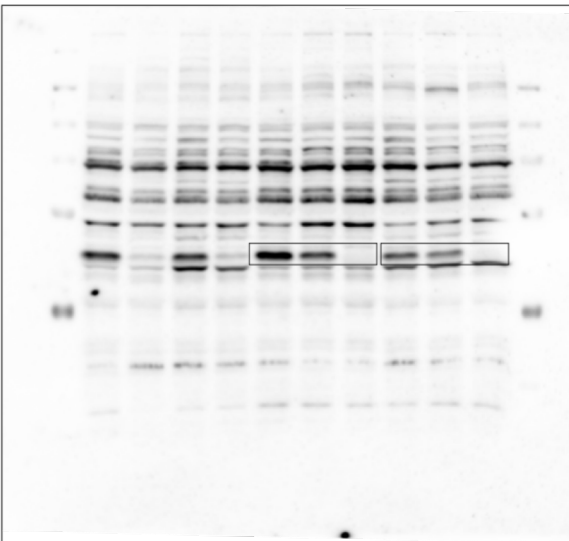

Vinculin (117 kDa)

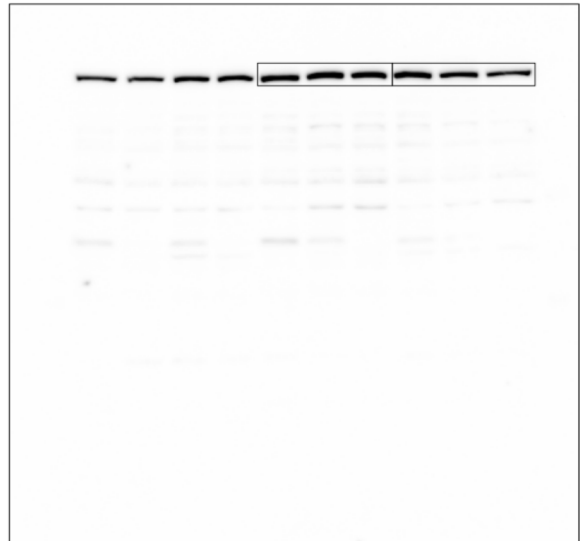

# Figure 2C

p-PDH (43 kDa)

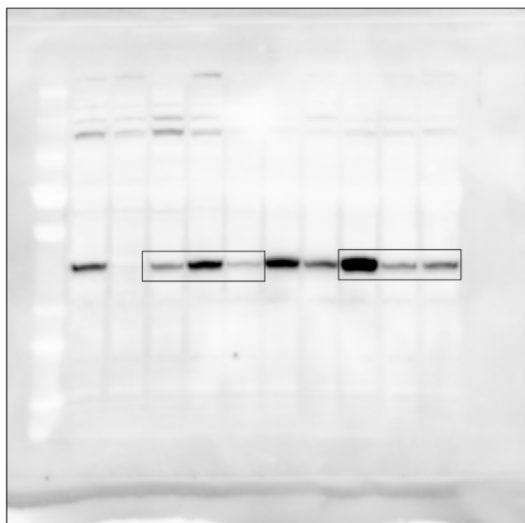

Vinculin (117 kDa)

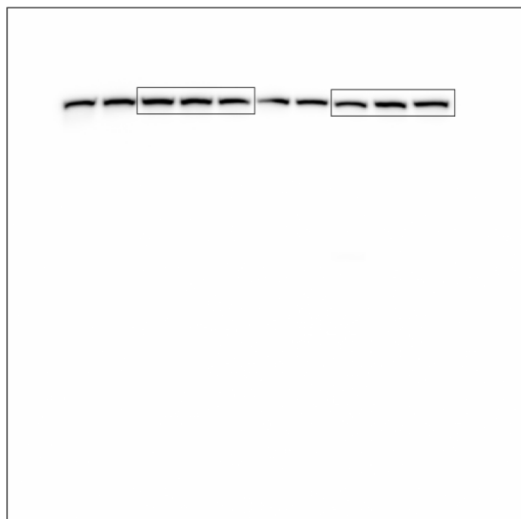

# Figure 2D

PDHK1 (45 kDa)

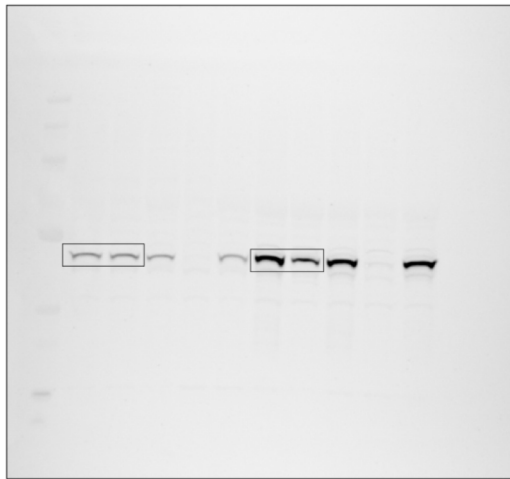

PDHK2 (45 kDa)

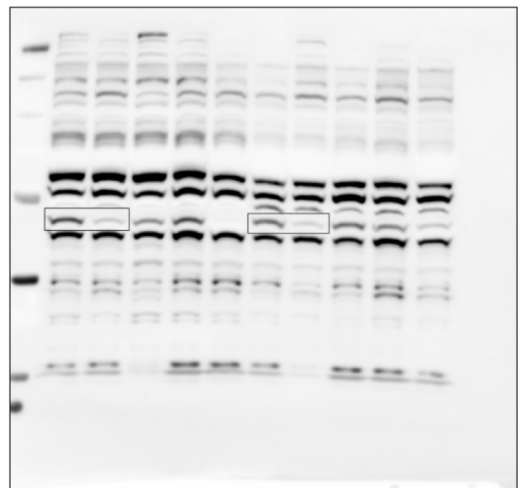

Vinculin (117 kDa)

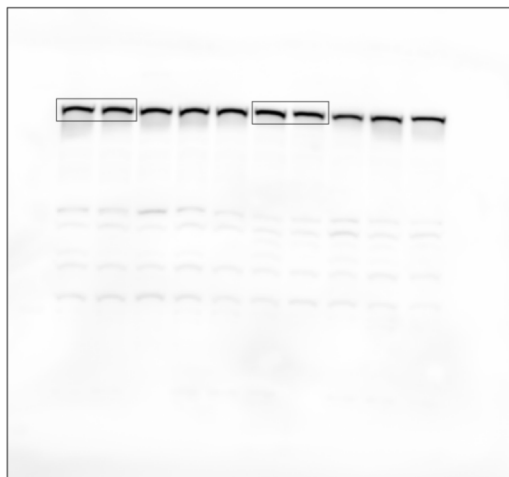

Figure 2E

p-PDH (43 kDa)

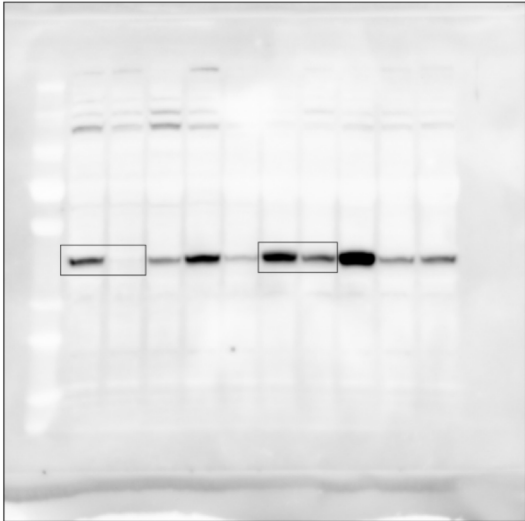

Vinculin (117 kDa)

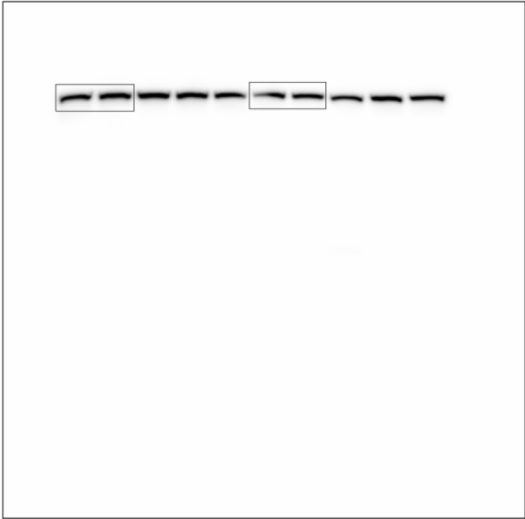

Supplement: s1 [file s1]
